# Supplementary material for: Production of Avaroferrin and Putrebactin by Heterologous Expression of a Deep-Sea Metagenomic DNA
Source: PubMed Central journal article supplement (PMC4178481; doi:10.3390/md12094799), 2014-09-12
Supplement: marinedrugs-12-04799-s001.pdf [file marinedrugs-12-04799-s001.pdf]

## Supplementary Information

**Figure S1.** Results of CAS assay.

**Figure S2.** Selected ion current LC-MS chromatogram of the culture broths.

**Figure S3.**  $^1\text{H}$  NMR spectrum of avaroferrin (**1**) in  $\text{CD}_3\text{OD} + \text{DMSO-}d_6$ .

**Figure S4.**  $^{13}\text{C}$  NMR spectrum of avaroferrin (**1**) in  $\text{CD}_3\text{OD} + \text{DMSO-}d_6$ .

**Figure S5.** High Resolution ESI MS spectra of avaroferrin (**1**).

**Figure S6.**  $^1\text{H}$  NMR spectrum of putrebactin (**3**) in  $\text{CD}_3\text{OD} + \text{DMSO-}d_6$ .

**Figure S7.** High resolution ESI MS spectra of putrebactin (**3**).

**Table S1.** Amino acid sequence homology and most abundant products.

**S1.** DNA sequence of synthetic *bibC<sup>C</sup>* gene.

**S2.** DNA sequence of synthetic *pubC* gene.

**Figure S1.** Chrome azurol S assay results of compound **1–3**. All experiments were performed triplicate and values are average of three (error bar: SD).

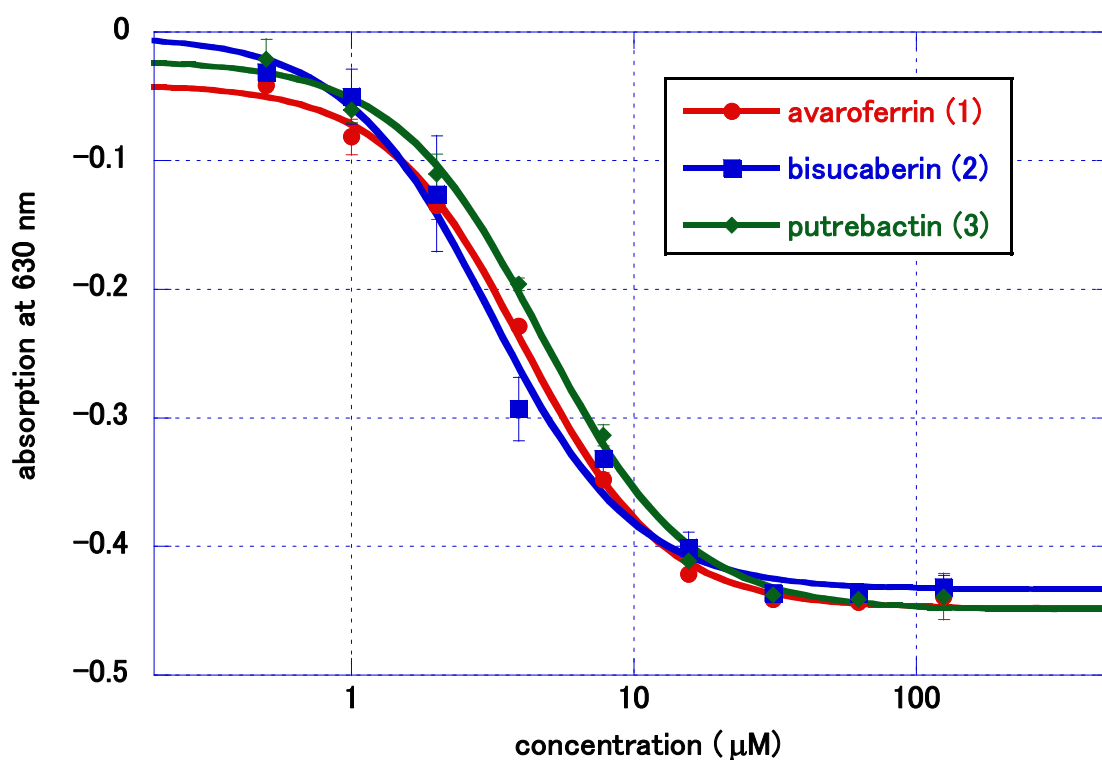

**Figure S2.** Selected ion current LC-MS chromatogram of the culture broths of the marine metagenome originated *mbsA-C* clone (a) and vector only clone (b). *MbsA-C* clone exhibited ion peaks of compounds 4 and 5, while peaks corresponding to condensed products 1–3, and 6–8 were absent.

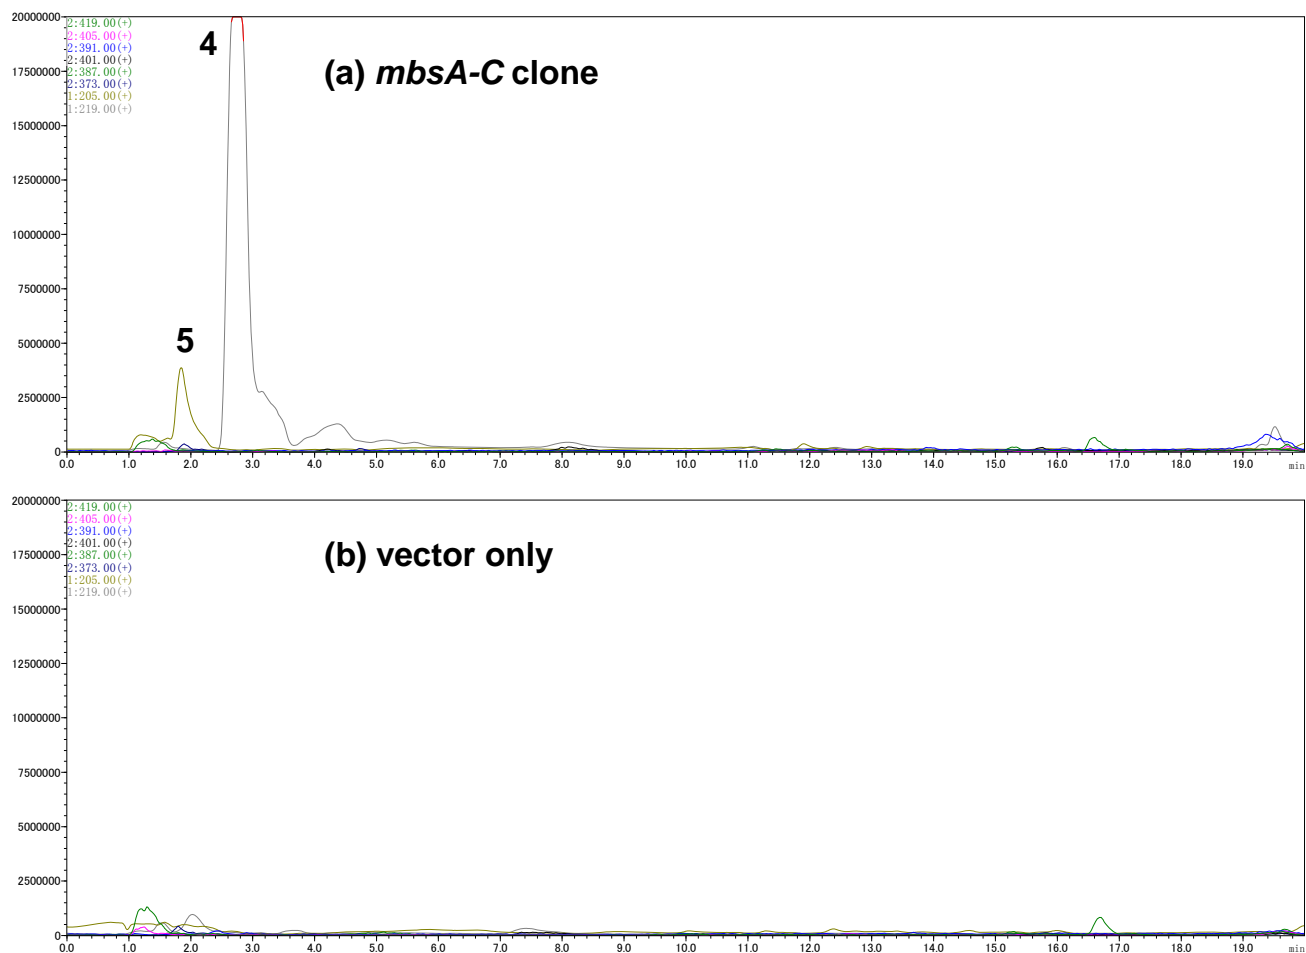

**Figure S3.**  $^1\text{H}$  NMR spectrum of avaroferrin (1) in  $\text{CD}_3\text{OD} + \text{DMSO-}d_6$ .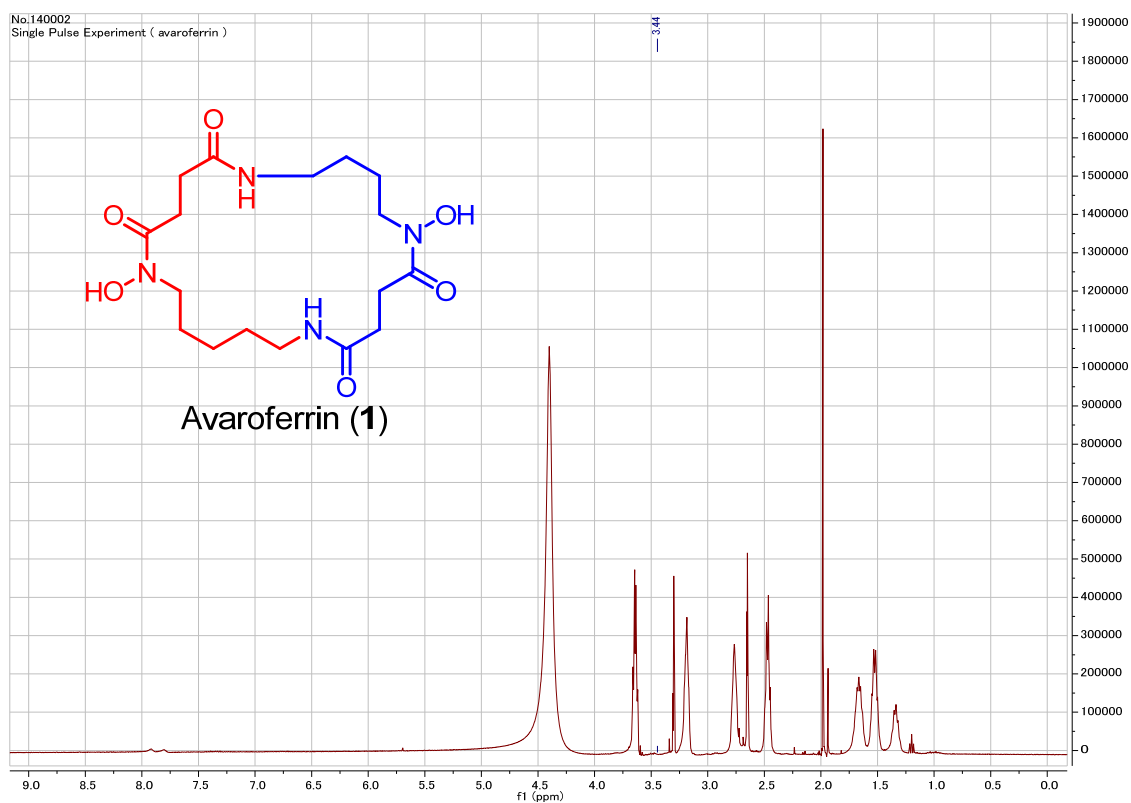**Figure S4.**  $^{13}\text{C}$  NMR spectrum of avaroferrin (1) in  $\text{CD}_3\text{OD} + \text{DMSO-}d_6$ .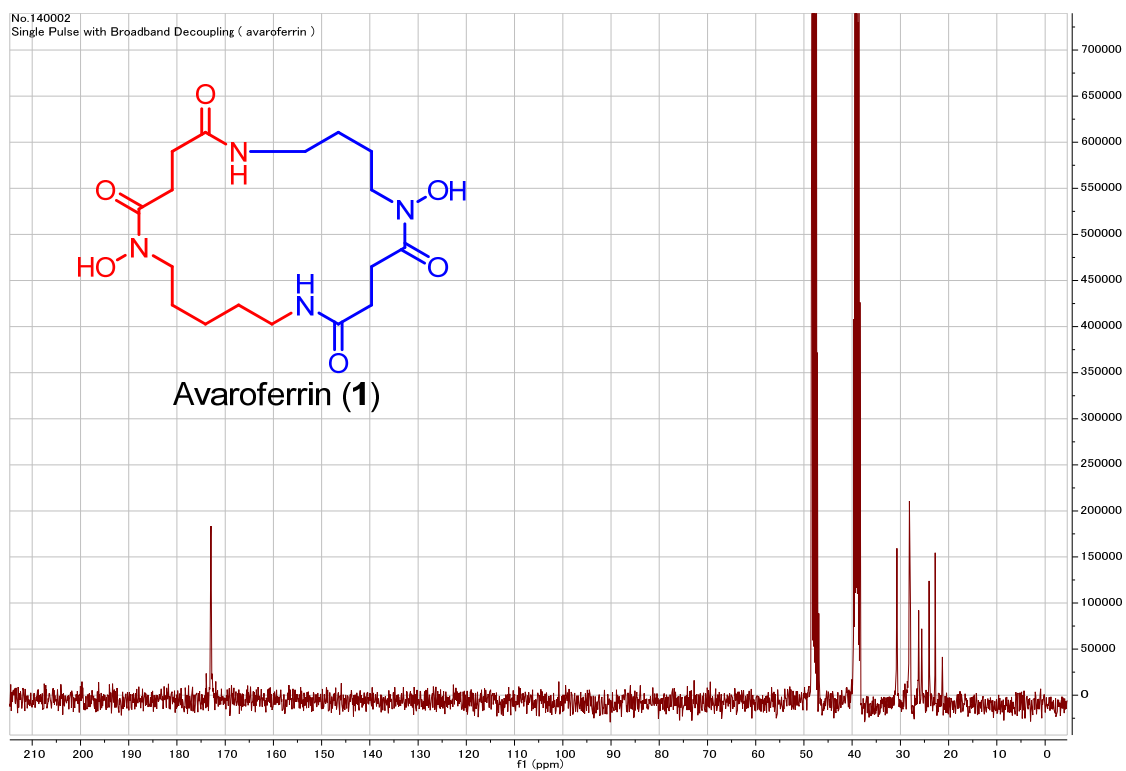

**Figure S5.** High Resolution ESI MS spectra of avaroferrin (1).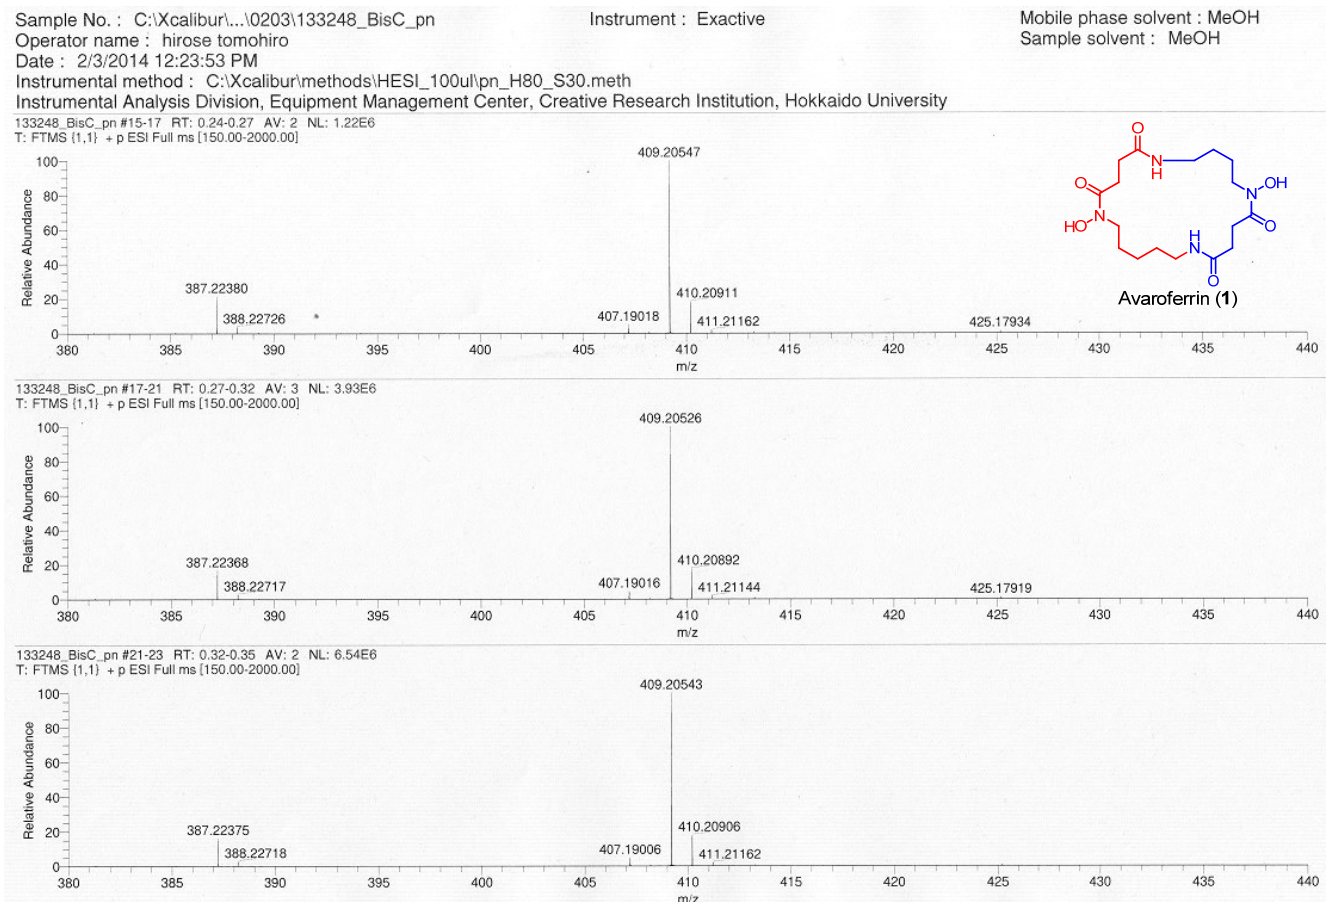**Figure S6.**  $^1\text{H}$  NMR spectrum of putrebactin (3) in  $\text{CD}_3\text{OD} + \text{DMSO-}d_6$ .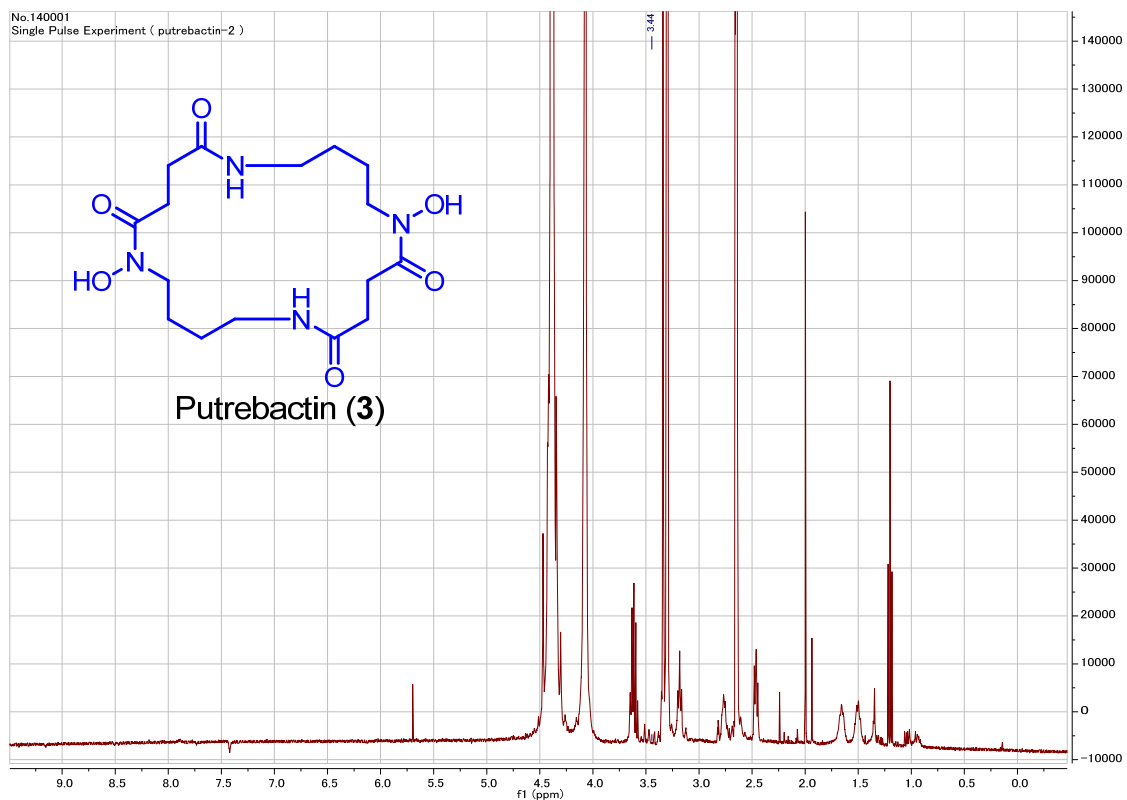

**Figure S7.** High resolution ESI MS spectra of putrebactin (3).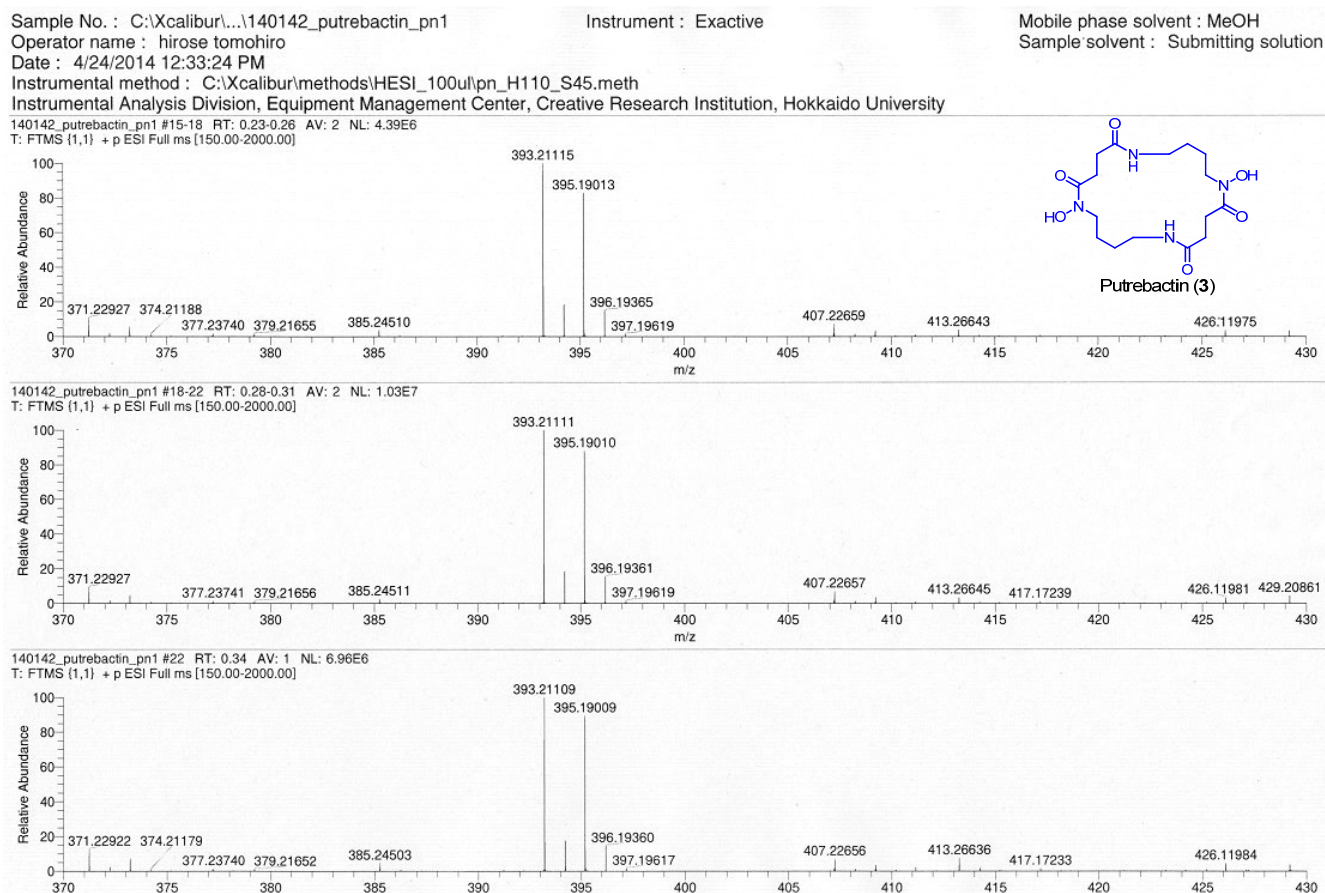**Table S1.** Amino acid sequence homology and most abundant products.

|                   | BibC <sup>C</sup> | PutC | Major Product     |
|-------------------|-------------------|------|-------------------|
| MbsD              | 63%               | 64%  | bisucaberin (2)   |
| BibC <sup>C</sup> |                   | 59%  | bisucaberin B (7) |
| PutC              |                   |      | putrebactin (3)   |
| AvaD <sup>a</sup> |                   |      | avaroferrin (1)   |

AvaD<sup>a</sup>: sequence data not shown.**S1. DNA sequence of synthetic *bibC<sup>C</sup>* gene**

GTCGACATGAAGAATAGCAGCAAGAATCCAAGTTTGAGCTTGGCCACGTCACATCTGACC  
 ACTGAATACTGGCACAAGGCAAATCAACATCTGATCGCAAAGATGATCACGGAAGCTGTCGC  
 ACGAACAGATCATAACACCGATAAAGTTAGACGACGCGTCAAACGCCCAAGCTGCTAGTT  
 GGTGTATAACCTTTAACTCTGATACCGGTACCTCAGAGTATTTGTTCCGCGCTCGGCAATAC  
 CAACTGGATCATCTGTTTCGTAGAGCCTCAATCCATTACCTGTACTAAGGATGATAAGAACCA  
 ACCGCTGGATGCCGTTTCCTTTATCCTGAGTTGTAGACATTTGCTTGAAATTAGTGACGCGT  
 TGCTTCCGACGTACCTGGAAGAGATTACGAGTACGTTATATAGCAAAGCCTATAAGCTTATG  
 CATCAAATAAGACCTCCGCCAATTAGCCAACGCGTCATACCAAGAGATAGAAGCAGCAA  
 TGACAGAAGGACATCCCGTTTTCATAGCGAATAATGGAAGAATAGGTTTCGATATGTTAGAC

CACGTGGAATTTAGCCCTGAATCAGGTCAGTCCCTGAACTTACAGTGGATCGCAGTGTTAA  
 GAGAGAAGACCTCCTTTGCGGTTATAGAATCACTGTTCGTACGATAGACTTATCTTCGATGAA  
 TTGGGTCAGTCTCAGCTTAACGAATCAACCAGCAACTGTTCGATGCAGGGTTTAGAACCT  
 CTCACTACTACCTTATGCCTATCCACCCGTGGCAATGGAGAGAAAAGATTTACGGATATTC  
 GCGGCGGATATTGCAAACCAGTATGTAGTGCCATTGGGAACTACGGAAGATAAGTATCAAG  
 CACAGCAGAGTATTCGGACTTTCTTCAATTTAAGCTCGCCGGAGAAATGTTACGTGAAGAC  
 GGGCCTTTCTATTCTGAATATGGGTTTCATGCGTGGGCTTTCTCCTTATTATATGAGCCGGAC  
 CCCGGCTATTAACACCTTCATCGCAAATTTGATTGAGACTGACCCGTACTTCGCTAAGAAGC  
 AGTTCTTCGTTTTAAAGGAAGTAGCAGCGATCGGCTACCACCATTCTACTACGAGCAAGC  
 TACGCGGACTGATAATCCGTATAAGAAGATGCTGTCTAGTCTTTGGCGGGAGTCGCCCTATG  
 CTCCAGATCAACACGGAAATGTACTGGTGAACAAGCAGCAGAAATTGTTAACTATGGCCTC  
 CTTGTTGCATGTGGATGATCAGGGAAAATCACTGATATCAGCCCTGATGGCCGACTCTCCAC  
 TTAGTGATCAAACTGGCTGAAGCAGTACATGGATTTATACTTGCAACCACTGCTGCATAGC  
 TTCTTTGCCTATGATTTGGTTTTTCATGCCCATGGTGAGAATCTGATTCTGGTATTAGAGGAC  
 AATTCTCCCATCAAGATAATTATGAAGGATATCGGAGAAGAGGTGGCGATCCTTAACGGGG  
 AAAAGACACTTCAAACGATATGAACTGCTTGGCAGTCGATCTGGAAGACCCTATGAACT  
 GAACTACATCTTGCTGGATATATTCGATTGTATCTTCCGCTTCATAGCACCTTTACTGGAGCA  
 ACAGACTCAAGTTTCAGAGAGCGACTTCTGGGAAATCGTTGCTGATTCAGTCAAGGATTAC  
 CAACAGGAGCATCCGCAGTTTGATGCGAAATATCAGCGGTACGATTTGTACTGCTCTAGCTT  
 CGCGCGGACATGTTTGAATCGTATCCAGCTTAATAATAATCAGCAAATGATCGACCTGGAGG  
 ATAGAGAGAAGAATCTTAGATTTGCCGAGGATATCGCAAATCCACTGGCATTGTTTGCTAAG  
 ACACATCGTATCATCGGGCCC

## S2. DNA sequence of synthetic *pubC* gene

GTCGACATGAATCTGGCAACCAATCGTGCGTACTGAAGCCGTTTACGCAGGCCGAGTTTC  
 CGACTCTGGAAGCGGCAGCACATCCGCATGTTCCGGCACATTTGATGCCGGAATACTGGCA  
 AGCAGCAAATCGCCATCTGGTGAAGAAAATCCTGTGTGAATTCACCCACGAGAAAATTATC  
 AGCCCGCAAATCTATCGTCAAGCAGCCGGGATTAACCACTATGAACTGCGCCTGAAAGATT  
 GCACCTATTACTTCTCGGCCCGCCATTATCAATTGGATCATCTCGAAATTGAGGCTGGTAGC  
 ATCCGCGTGTCAAGTGCGGGCCAGGATAAACCGCTGGATGCGATGTCCTTAATTATCAAGC  
 TGAAAGACGCTCTGGGTATGTCAGAGACATTACTGCCGACCTATCTTGAGGAAATCACCTC  
 GACCCTTTACAGCAAAGCTTACAAATTGGCGCATCAAGCGATTCCTGCTACAACCTCTGGCG  
 AAAGCGGATTATCAGACGATTGAGGCGGGTATGACGGAAGGACACCCAGTTTTTCATTGCGA  
 ACAATGGTTCGTATTGGCTTTGACATGCAGGATTATGATCAGTTTGCACCAGAAAGCGCTTCG  
 GCACTCCAGTTGGTTTGGATTGCGGTTTCGCAAAGACAAGACCACCTTCAGCTCTTTGGAA  
 GGTCTGGATCATGACTCTCTGCTTAAACAGGAACTGGGTGAACAGTTCACGAAATTTACAGC  
 AGCACCTGTCGGCTTTAGGTCAAGCGGCAGATTCGTTTTACTTCATGCCGGTTCACCCATG  
 GCAGTGGCGTGAGAAAATTGCCCGTACATTTGCCGGCGAAATTGCGCGTGGGGATATCATT  
 TATCTGGGCGAAAGTCAGGACTGTTACCAGGTCCAACAGTCGATCCGGACCTTCTTCAACT  
 TATCTGCGCCACAGAAGTGCTACGTGAAAACCGCCCTGAGCATCCTCAACATGGGGTTTAT  
 CGGTGGCTTATCTCCGCTGTATATGAGCTGTACGCCCCAGATCAACGCTTGGGTTGCGGATC

TCATTGAATCCGACTCCTATTTTGCGGAACAAGGCTTCGTCATTCTCAAAGAAATCGCAGCC  
ATTGGTTATCACCATCGCTACTATGAGGAAGCATTGACTCAAGACTCAGCTTACAAGAAAAT  
GCTTTCTGCGCTGTGGCGCGAGTCCCCTCTGCCGCATATTGAACCACAGCAAACGCTGATG  
ACGATGGCTGCCTTACTGCATGTGGACCACCAAGAACAGGCCTTGTTGGCCGCGCTGATCA  
AACACAGTGGCTTAAGCGCGAAAGAATGGGTCAAACGGTATCTGAATCTGTATCTGAGTCC  
GTTGCTGCACGCTTTCTTTGCCTACGATCTTGTCTTTATGCCTCATGGCGAAAACCTTATTCT  
GGTCTTGGATGCAGGCATTCCCGTGAAAATCCTGATGAAAGACATTGGAGAGGAAGTAGC  
CGTGCTGAACGGGTCCGAACCCCTCCCGCAAGAGGTACAGCGTCTGGCGGTGGAACCTTGA  
AGAAGAGATGAAACTGAACTACATTCTCCTGGATATCTTTGATTGCATTTTCCGCTATCTTGC  
CCCGATTCTGGATAAACAGACCGAAGTGAGTGAGGCGCAGTTTTGGGAATTAGTAGCGGAT  
AATGTGCGTGATTACCAAGCCCAGCATCCGCAGTTAGCCGACAAGTTCGCTCAATATGACC  
TGTTCAAAGATAGCTTTGTACGCACTTGCCTGAATCGCATCCAGCTCAACAACAACCAGCA  
AATGATCGATCTGGCCGATCGCGAAAAGAATCTGCGCTTTGCGGGTGGCATTGACAATCCT  
CTGGCCGCATTTGCGCAGTCACACGCCTTTGGAAACCAGAAACTGAAACCCAAAAGCGGG  
CCC
